# Supplementary material
Source: Springer Nature journal article supplement (https://www.springermedizin.de/resource/supplementary/12889_2011_3759_MOESM3_ESM.pdf/9493228)

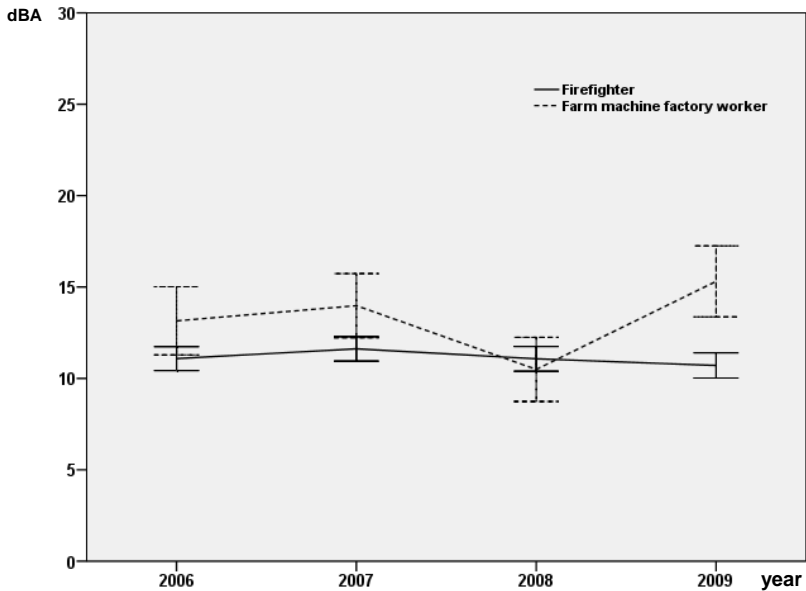

Supplement: MOESM3 [file 9493228]
